# Supplementary material
Source: PubMed Central journal article supplement (PMC8436362)
Supplement: TBSD_A_1969281_SM3563.pdf [file TBSD_A_1969281_SM3563.pdf]

# **SUPPLEMENTARY MATERIAL FOR**

## **Myxobacterial depsipeptide chondramides interrupt SARS-CoV-2 entry by targeting its broad, cell tropic spike protein**

Rey Arturo Fernandez<sup>a</sup>, Mark Tristan Quimque<sup>a,b,c</sup>, Kin Israel Notarte<sup>d</sup>, Joe Anthony H. Manzano<sup>a,e</sup>, Delfin Yñigo Pilapil IV<sup>a,e</sup>, Von Novi de Leon<sup>a,e</sup>, John Jeric San Jose<sup>a</sup>, Omar Villalobos<sup>f</sup>, Nisha Harur Muralidharan<sup>g</sup>, M. Michael Gromiha<sup>g</sup>, Simone Brogi<sup>h</sup>, Allan Patrick G. Macabeo<sup>a,\*</sup>

<sup>a</sup>Laboratory for Organic Reactivity, Discovery and Synthesis (LORDS), Research Center for the Natural and Applied Sciences, University of Santo Tomas, España Blvd., Manila 1015, Philippines

<sup>b</sup>The Graduate School, University of Santo Tomas, España Blvd., Manila 1015, Philippines

<sup>c</sup>Chemistry Department, College of Science and Mathematics, Mindanao State University – Iligan Institute of Technology, Tibanga, 9200 Iligan City, Philippines

<sup>d</sup>Faculty of Medicine and Surgery, University of Santo Tomas, España Blvd., Manila 1015, Philippines

<sup>e</sup>Department of Biological Sciences, College of Science, University of Santo Tomas, España Blvd., Manila 1015, Philippines

<sup>f</sup>Department of Pharmacy, Faculty of Pharmacy, University of Santo Tomas, España Blvd., Manila 1015, Philippines

<sup>g</sup>Department of Biotechnology, Bhupat and Jyoti Mehta School of Biosciences, Indian Institute of Technology (IIT) Madras, Chennai 600 036, Tamilnadu, India

<sup>h</sup>Department of Pharmacy, University of Pisa, Via Bonanno 6, 56126, Pisa, Italy

\*Corresponding author: [agmacabeo@ust.edu.ph](mailto:agmacabeo@ust.edu.ph) / [allanpatrick\\_m@yahoo.com](mailto:allanpatrick_m@yahoo.com); Tel No. +632-34061611 local 4057; Fax No. +632-87314-031.

## Table of Contents

|                                                                                                                                                                                                                                                                                                                                                                                                                                                                                                                                                                                                                                                                                                                                                                                                                                                                                                                             | Page |
|-----------------------------------------------------------------------------------------------------------------------------------------------------------------------------------------------------------------------------------------------------------------------------------------------------------------------------------------------------------------------------------------------------------------------------------------------------------------------------------------------------------------------------------------------------------------------------------------------------------------------------------------------------------------------------------------------------------------------------------------------------------------------------------------------------------------------------------------------------------------------------------------------------------------------------|------|
| <b>Figure S1.</b> Chemical structures of the myxobacterial secondary metabolites <b>1-24</b> .                                                                                                                                                                                                                                                                                                                                                                                                                                                                                                                                                                                                                                                                                                                                                                                                                              | 4    |
| <b>Figure S2.</b> Chemical structures of the myxobacterial secondary metabolites <b>24-48</b> .                                                                                                                                                                                                                                                                                                                                                                                                                                                                                                                                                                                                                                                                                                                                                                                                                             | 5    |
| <b>Figure S3.</b> Chemical structures of the myxobacterial secondary metabolites <b>49-72</b> .                                                                                                                                                                                                                                                                                                                                                                                                                                                                                                                                                                                                                                                                                                                                                                                                                             | 6    |
| <b>Figure S4.</b> (A) Superposition between the docking output from AutoDock Vina (grey surface for the protein and green sticks for the ligand) and Glide considering the Brazilian variant (pink sticks for the ligand), RMSD of 1.011 Å; (B) superposition between the docking output from AutoDock Vina (grey surface for the protein and green sticks for the ligand) and Glide considering the South African variant (cyan sticks for the ligand), RMSD of 0.717 Å; (C) superposition between the docking output from AutoDock Vina (grey surface for the protein and green sticks for the ligand) and Glide considering the UK variant (yellow sticks for the ligand), RMSD of 0.936 Å; (D) superposition between the docking output from AutoDock Vina (grey surface for the protein and green sticks for the ligand) and Glide considering the wild type protein (magenta sticks for the ligand), RMSD of 0.984 Å. | 7    |
| <b>Table S1.</b> Docking scores of myxobacterial secondary metabolites <b>1-72</b> against SARS-CoV-2 spike protein receptor-binding regions.                                                                                                                                                                                                                                                                                                                                                                                                                                                                                                                                                                                                                                                                                                                                                                               | 8    |
| <b>Table S2.</b> Summary of the binding energies (BE) and interacting residues of the top compounds against SARS-CoV-2 spike wild-type and variants I472V, A475V and L452Y.                                                                                                                                                                                                                                                                                                                                                                                                                                                                                                                                                                                                                                                                                                                                                 | 10   |
| <b>Table S3.</b> Summary of the binding energies (BE) and interacting residues of the top compounds against SARS-CoV-2 spike wild-type and variants V438A, F490L, S477N and N439K                                                                                                                                                                                                                                                                                                                                                                                                                                                                                                                                                                                                                                                                                                                                           | 11   |
| <b>Table S4.</b> List of active residues set and protein-protein dock poses during protein-protein docking of spike against host receptors.                                                                                                                                                                                                                                                                                                                                                                                                                                                                                                                                                                                                                                                                                                                                                                                 | 12   |
| <b>Table S5.</b> Summary of binding energies of top compounds against spike RBD for ACE2 or GRP78, ACE2, and GRP78 based on selectivity docking.                                                                                                                                                                                                                                                                                                                                                                                                                                                                                                                                                                                                                                                                                                                                                                            | 13   |
| <b>Table S6.</b> Lipinski's Rule of Five for ADME analysis of compounds <b>1-8</b> .                                                                                                                                                                                                                                                                                                                                                                                                                                                                                                                                                                                                                                                                                                                                                                                                                                        | 13   |

**Table S7.** Predicted toxicity parameters and solubility of compounds **1–8**. 14

**Table S8.** Docking grid coordinates of SARS-CoV-2 spike proteins and host receptors. 14

**References** 14

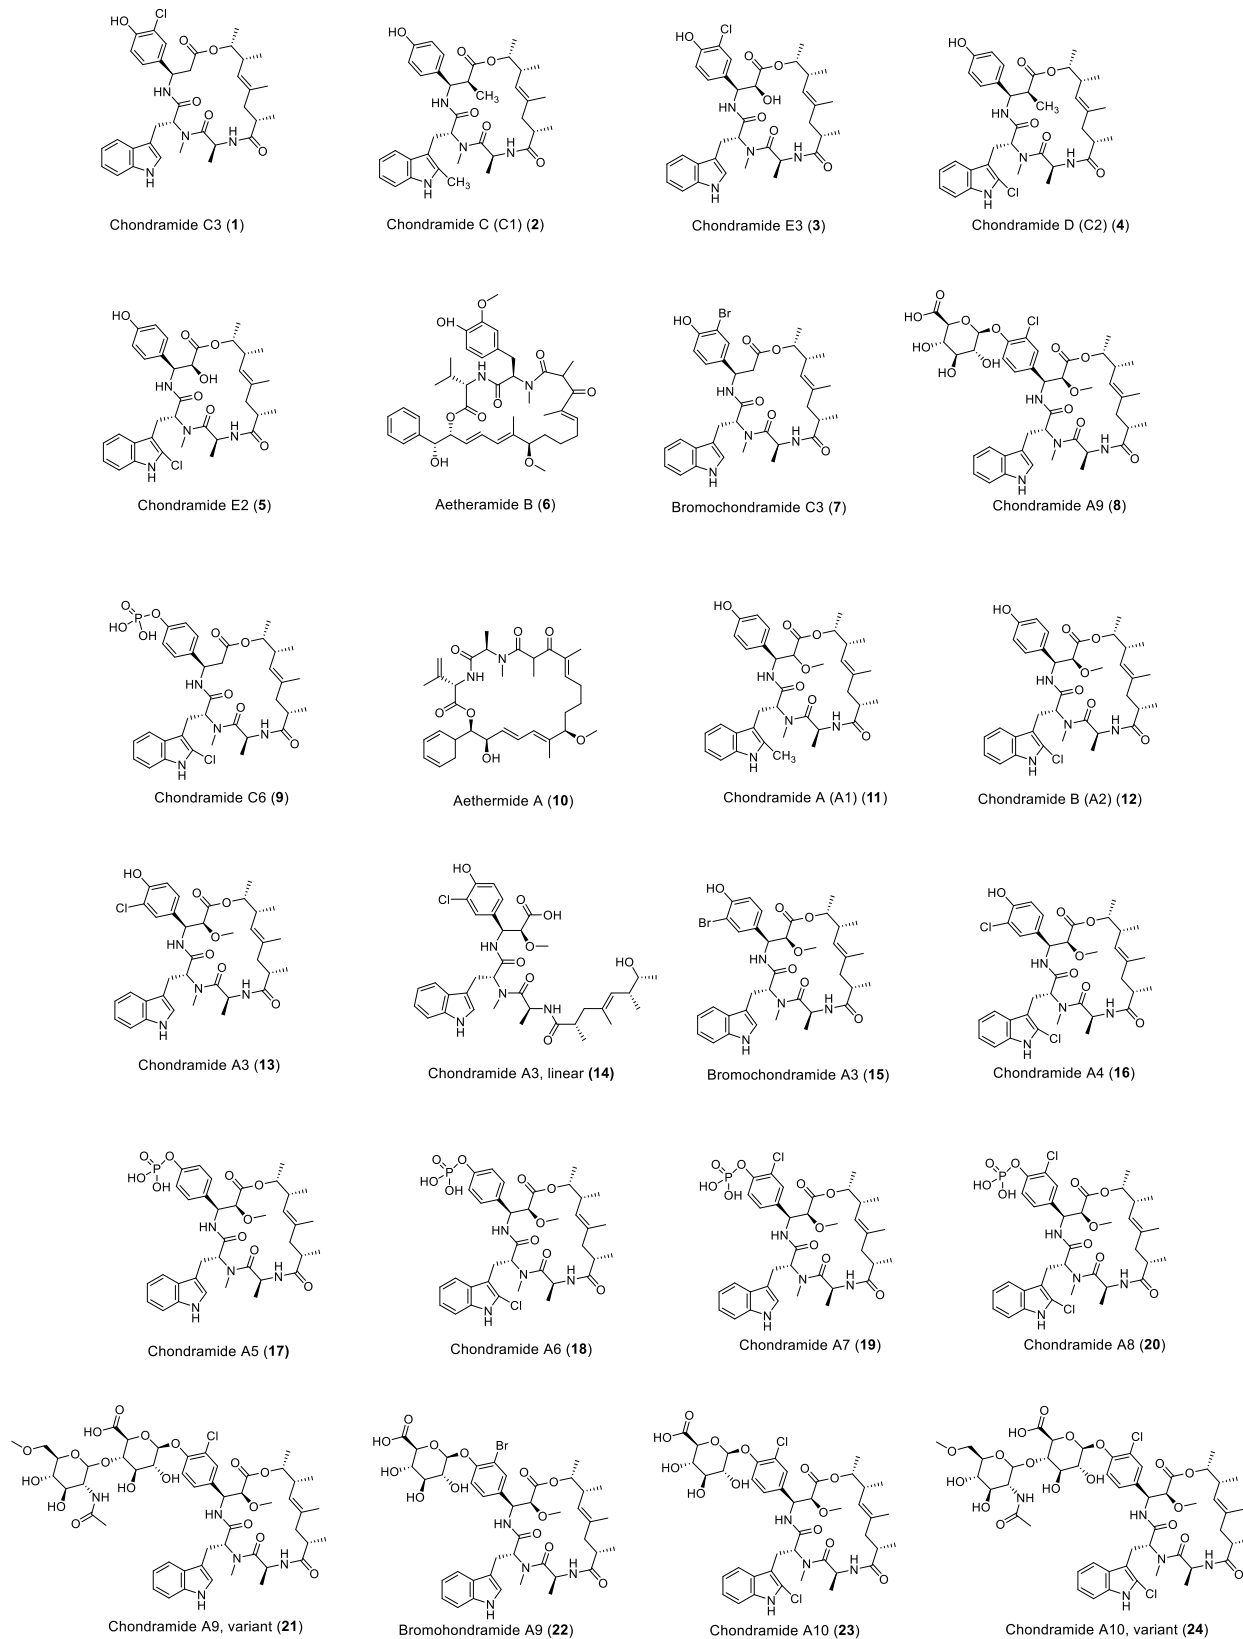

**Figure S1.** Chemical structures of the myxobacterial secondary metabolites **1-24**.

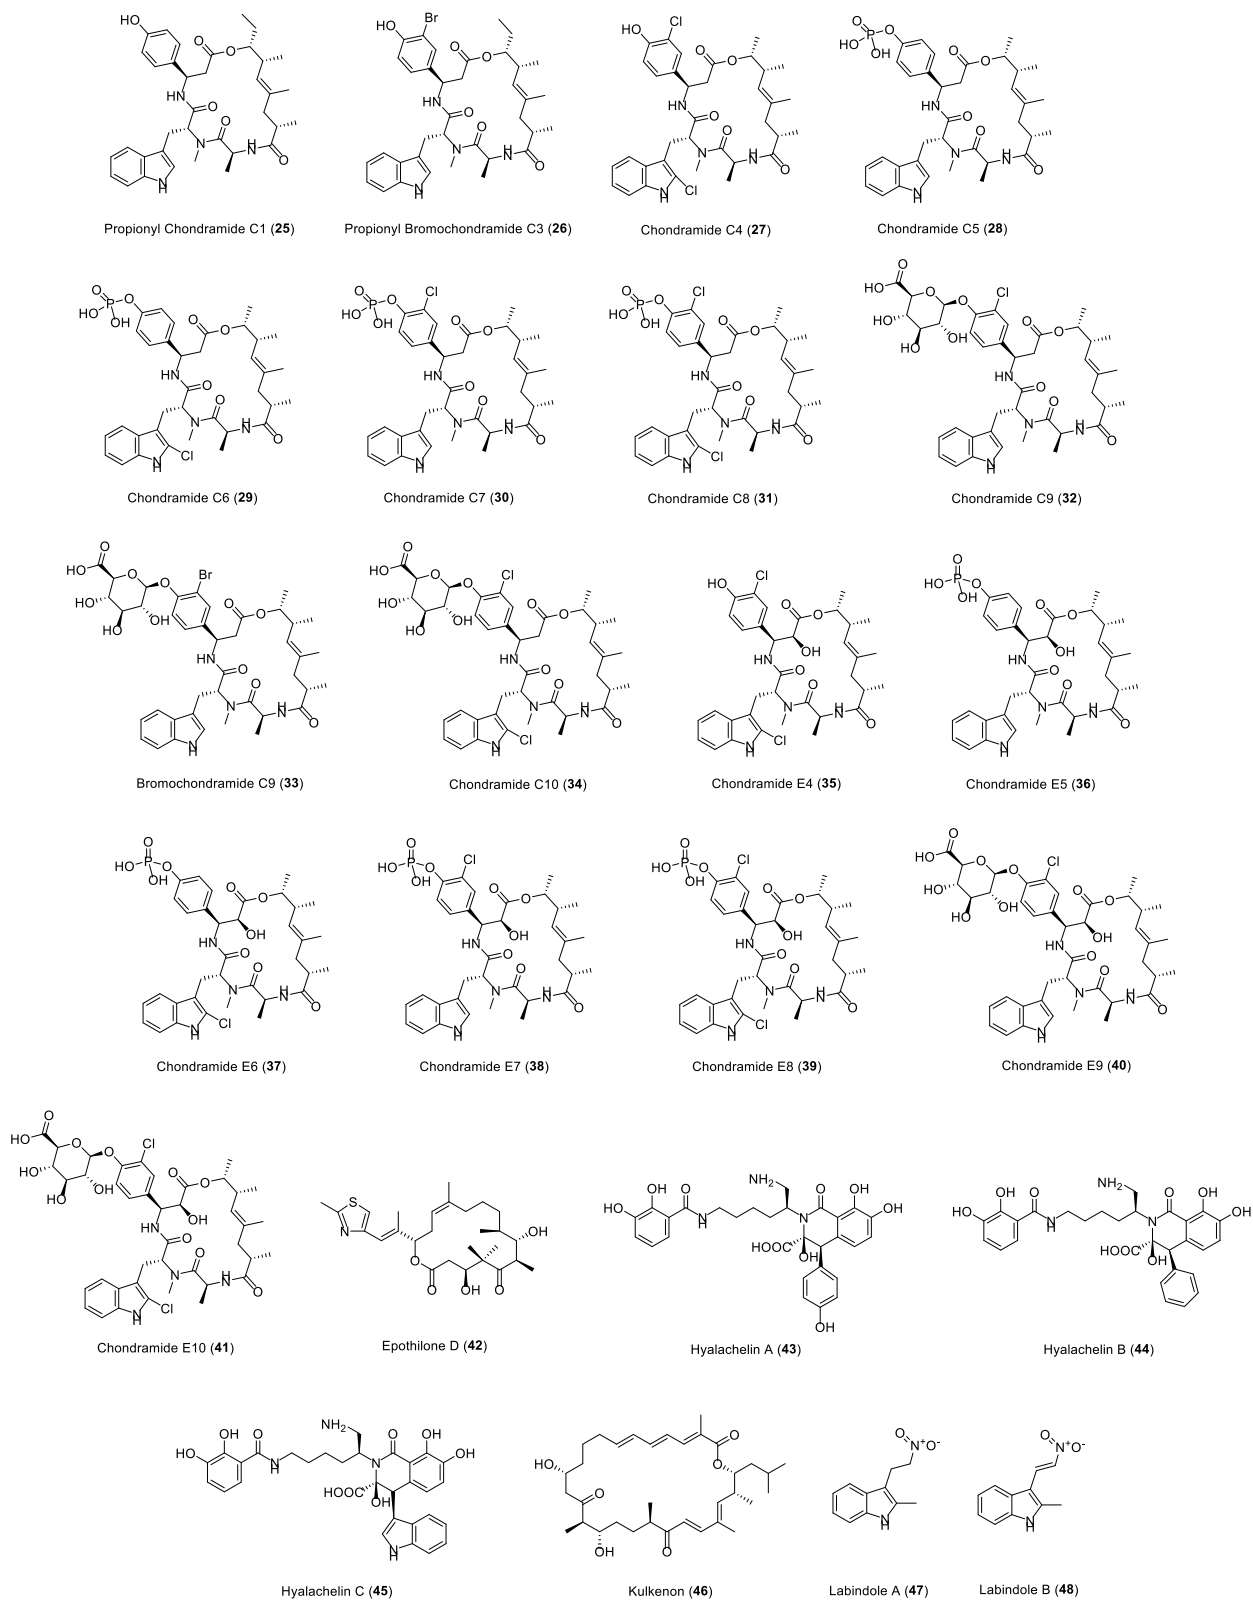

**Figure S2.** Chemical structures of the myxobacterial secondary metabolites **25-48**.

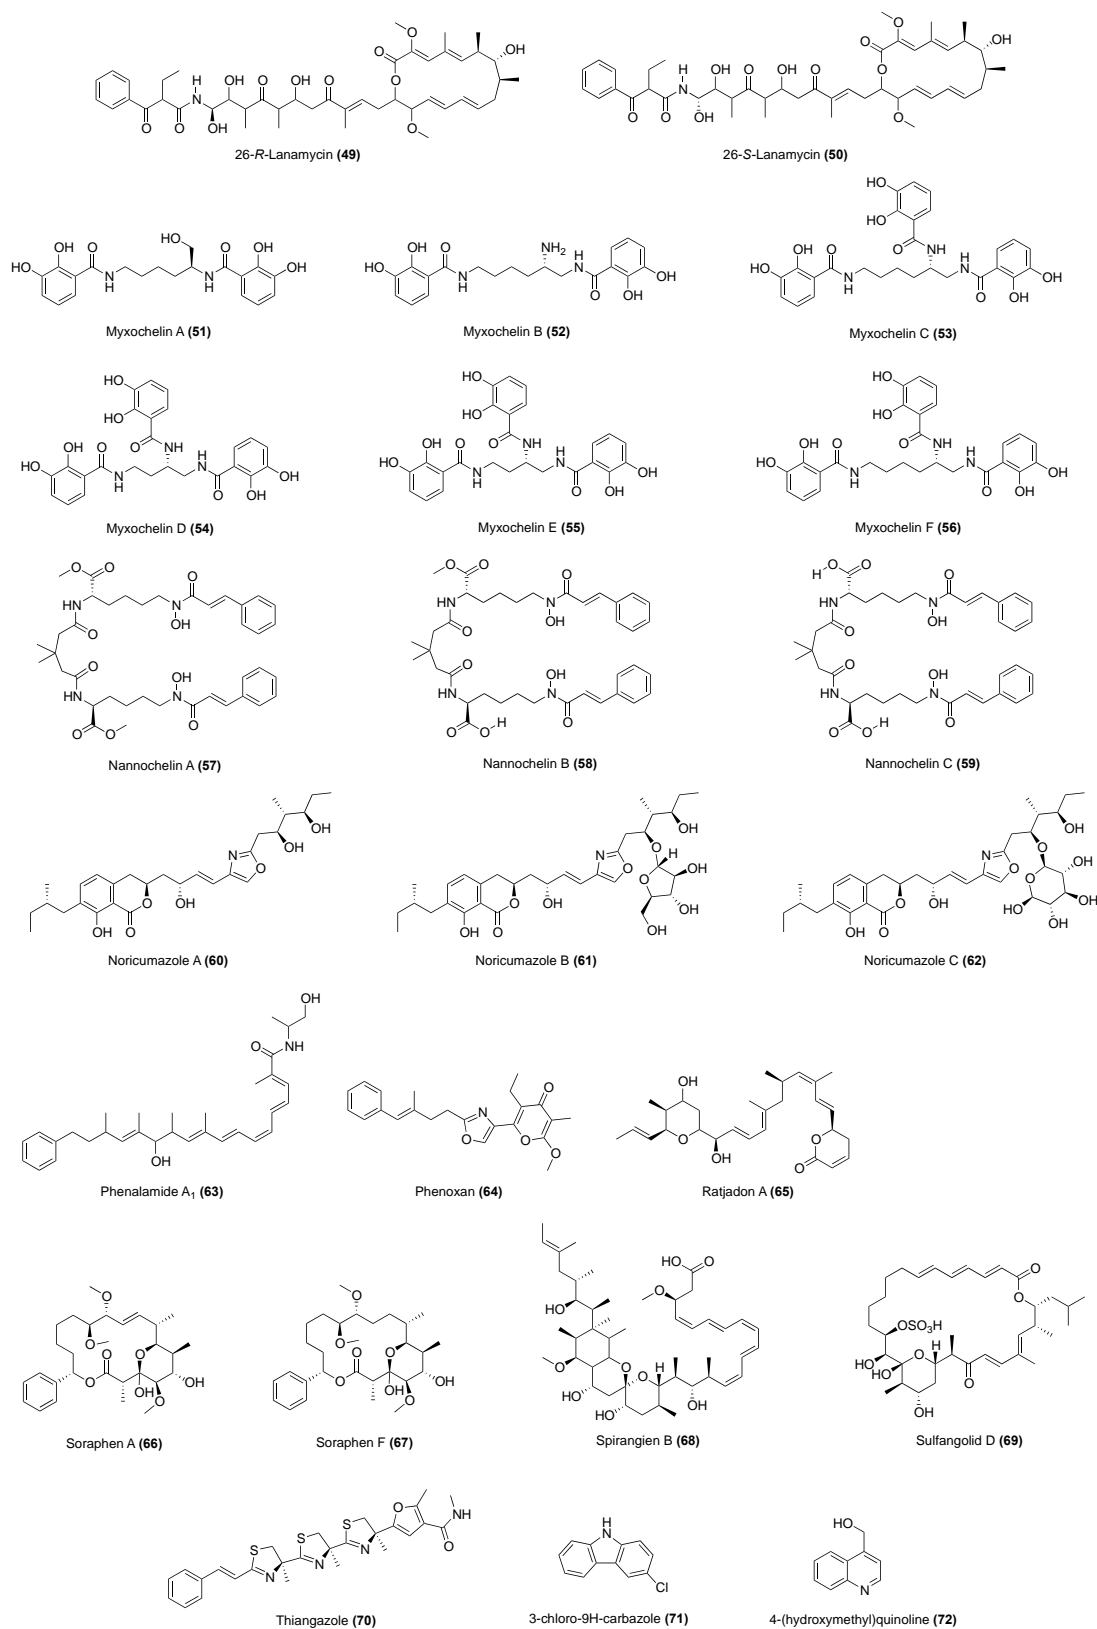

**Figure S3.** Chemical structures of the mycobacterial secondary metabolites **49-72**.

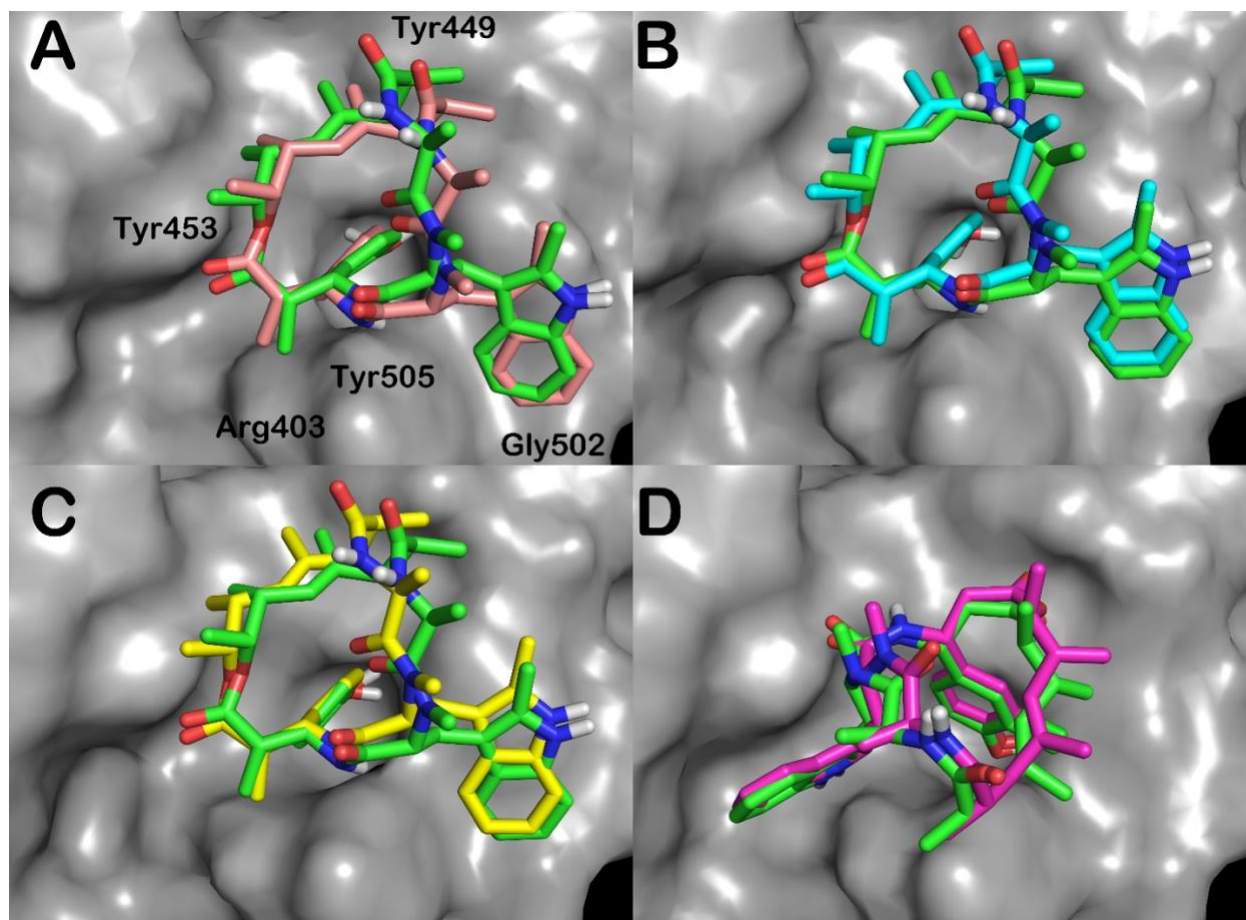

**Figure S4.** (A) Superposition between the docking output from AutoDock Vina (grey surface for the protein and green sticks for the ligand) and Glide considering the Brazilian variant (pink sticks for the ligand), RMSD of 1.011 Å; (B) superposition between the docking output from AutoDock Vina (grey surface for the protein and green sticks for the ligand) and Glide considering the South African variant (cyan sticks for the ligand), RMSD of 0.717 Å; (C) superposition between the docking output from AutoDock Vina (grey surface for the protein and green sticks for the ligand) and Glide considering the UK variant (yellow sticks for the ligand), RMSD of 0.936 Å; (D) superposition between the docking output from AutoDock Vina (grey surface for the protein and green sticks for the ligand) and Glide considering the wild type protein (magenta sticks for the ligand), RMSD of 0.984 Å.

**Table S1.** Docking scores of myxobacterial secondary metabolites **1-72** against SARS-CoV-2 spike protein receptor-binding regions.

| Cpd       | Binding energy (kcal/mol) |           |                     | Cpd       | Binding energy (kcal/mol) |           |                     |
|-----------|---------------------------|-----------|---------------------|-----------|---------------------------|-----------|---------------------|
|           | ACE2 RBD                  | GRP78 RBD | NRP1 binding region |           | ACE2 RBD                  | GRP78 RBD | NRP1 binding region |
| <b>1</b>  | -8.7                      | -7.6      | -4.3                | <b>22</b> | -7.7                      | -7.7      | -5.6                |
| <b>2</b>  | -8.6                      | -7.9      | -5.2                | <b>23</b> | -7.3                      | -8.3      | -4.9                |
| <b>3</b>  | -8.4                      | -7.6      | -6.1                | <b>24</b> | -7.1                      | -8.5      | -5.3                |
| <b>4</b>  | -8.4                      | -7.8      | -4.9                | <b>25</b> | -7.4                      | -8.2      | -5.3                |
| <b>5</b>  | -8.2                      | -8.3      | -4.8                | <b>26</b> | -7.6                      | -7.3      | -4.4                |
| <b>6</b>  | -8.1                      | -7.7      | -6.3                | <b>27</b> | -7.7                      | -8.3      | -6.1                |
| <b>7</b>  | -8.1                      | -7.8      | -5.7                | <b>28</b> | -7.1                      | -7.7      | -4.7                |
| <b>8</b>  | -8                        | -8.7      | -5.2                | <b>29</b> | -7.6                      | -8.8      | -5.1                |
| <b>9</b>  | -7.2                      | -7.4      | -4.0                | <b>30</b> | -7.5                      | -8.0      | -4.8                |
| <b>10</b> | -7.4                      | -7.4      | -5.2                | <b>31</b> | -7.0                      | -7.6      | -4.8                |
| <b>11</b> | -7.9                      | -7.7      | -5.1                | <b>32</b> | -7.7                      | -8.2      | -5.7                |
| <b>12</b> | -7.5                      | -7.9      | -5.3                | <b>33</b> | -7.1                      | -8.1      | -6.0                |
| <b>13</b> | -6.2                      | -7.3      | -5.1                | <b>34</b> | -7.2                      | -7.6      | -5.9                |
| <b>14</b> | -7.7                      | -7.7      | -4.3                | <b>35</b> | -7.9                      | -7.8      | -5.1                |
| <b>15</b> | -7.5                      | -7.3      | -5.9                | <b>36</b> | -7.0                      | -8.0      | -4.9                |
| <b>16</b> | -7.5                      | -7.5      | -5.4                | <b>37</b> | -7.7                      | -7.6      | -5.2                |
| <b>17</b> | -7.5                      | -7.6      | -5.7                | <b>38</b> | -6.8                      | -7.3      | -5.0                |
| <b>18</b> | -7.5                      | -7.4      | -5.6                | <b>39</b> | -7.4                      | -7.3      | -4.5                |
| <b>19</b> | -7.3                      | -8.5      | -5.4                | <b>40</b> | -7.6                      | -8.4      | -5.2                |
| <b>20</b> | -7.8                      | -7.8      | -5.4                | <b>41</b> | -7.4                      | -7.3      | -5.6                |
| <b>21</b> | -7.4                      | -8.0      | -5.5                | <b>42</b> | -6.5                      | -7.2      | -5.1                |



| Cpd       | Binding energy (kcal/mol) |           |                     | Cpd       | Binding energy (kcal/mol) |           |                     |
|-----------|---------------------------|-----------|---------------------|-----------|---------------------------|-----------|---------------------|
|           | ACE2 RBD                  | GRP78 RBD | NRP1 binding region |           | ACE2 RBD                  | GRP78 RBD | NRP1 binding region |
| <b>43</b> | -6.8                      | -7.7      | -4.9                | <b>58</b> | -6.3                      | -7.6      | -5.2                |
| <b>44</b> | -6.8                      | -7.6      | -5.9                | <b>59</b> | -6.6                      | -7.1      | -4.6                |
| <b>45</b> | -6.6                      | -6.9      | -5.7                | <b>60</b> | -6.3                      | -7.6      | -6.0                |
| <b>46</b> | -6.8                      | -7.1      | -5.1                | <b>61</b> | -6.4                      | -7.2      | -4.9                |
| <b>47</b> | -6.5                      | -5.6      | -4.9                | <b>62</b> | -6.6                      | -7.2      | -6.0                |
| <b>48</b> | -6.3                      | -5.7      | -5.2                | <b>63</b> | -5.1                      | -6.3      | -4.2                |
| <b>49</b> | -7.4                      | -7.8      | -5.1                | <b>64</b> | -6.5                      | -7.4      | -5.8                |
| <b>50</b> | -6.7                      | -7.6      | -5.4                | <b>65</b> | -6.3                      | -7.3      | -4.8                |
| <b>51</b> | -6.7                      | -6.9      | -5.0                | <b>66</b> | -6.0                      | -5.7      | -4.0                |
| <b>52</b> | -6.2                      | -7.3      | -5.8                | <b>67</b> | -5.6                      | -5.8      | -4.4                |
| <b>53</b> | -6.9                      | -6.8      | -5.3                | <b>68</b> | -5.9                      | -6.7      | -4.3                |
| <b>54</b> | -6.6                      | -7.5      | -5.8                | <b>69</b> | -6.5                      | -6.6      | -5.4                |
| <b>55</b> | -6.4                      | -7.7      | -5.4                | <b>70</b> | -7.4                      | -8.4      | -6.5                |
| <b>56</b> | -5.8                      | -7.6      | -5.1                | <b>71</b> | -6.0                      | -6.0      | -5.7                |
| <b>57</b> | -6.1                      | -5.8      | -4.6                | <b>72</b> | -5.3                      | -5.4      | -4.9                |

**Table S2.** Summary of the binding energies (BE) and interacting residues of the top compounds against SARS-CoV-2 spike wild-type and variants I472V, A475V and L452R.

| Compounds                       | I472V       |                                                |                                                                                                                                            | A475V       |                                |                                                                                                                        | L452R       |                                        |                                                                                                                                          |
|---------------------------------|-------------|------------------------------------------------|--------------------------------------------------------------------------------------------------------------------------------------------|-------------|--------------------------------|------------------------------------------------------------------------------------------------------------------------|-------------|----------------------------------------|------------------------------------------------------------------------------------------------------------------------------------------|
|                                 | BE          | Conventional H-bonding                         | Other types of molecular interactions                                                                                                      | BE          | Conventional H-bonding         | Other types of molecular interactions                                                                                  | BE          | Conventional H-bonding                 | Other types of molecular interactions                                                                                                    |
| <b>Chondramide C3 (1)</b>       | <b>-8.7</b> | Glu406, Tyr449, Tyr453, Ser494, Tyr495, Tyr505 | Arg403 ( $\pi$ -cation), Lys417 ( $\pi$ -alkyl), Tyr453 ( $\pi$ - $\pi$ stacked), Tyr505 ( $\pi$ -alkyl)                                   | <b>-8.4</b> | Glu406, Tyr453, Ser494, Gly496 | Arg403 ( $\pi$ -cation), Gly496 ( $\pi$ -donor hydrogen bond) Tyr505 ( $\pi$ -alkyl), Gly496 (C-H bond)                | <b>-8.5</b> | Glu406, Tyr453, Ser494, Asn501,        | Arg403 ( $\pi$ -cation), Tyr453 ( $\pi$ - $\pi$ stacked), Gly496 ( $\pi$ -donor hydrogen bond), Tyr505 ( $\pi$ -alkyl) Gly496 (C-H bond) |
| <b>Chondramide C (2)</b>        | <b>-8.6</b> | Tyr453, Asn501, Tyr505                         | Tyr449 ( $\pi$ -alkyl), Tyr505 ( $\pi$ -alkyl, $\pi$ - $\pi$ stacked and $\pi$ - $\pi$ T-shaped)                                           | <b>-8.3</b> | Tyr449                         | Arg403 ( $\pi$ -cation), Tyr453 ( $\pi$ - $\pi$ stacked), Gly496 ( $\pi$ -donor hydrogen bond), Tyr505 ( $\pi$ -alkyl) | <b>-8.3</b> | Tyr449, Tyr505                         | Arg403 ( $\pi$ -cation), Tyr453 ( $\pi$ - $\pi$ stacked), Gly496 ( $\pi$ -donor hydrogen bond), Tyr505 ( $\pi$ -alkyl)                   |
| <b>Chondramide E3 (3)</b>       | <b>-8.4</b> | Glu406, Tyr453, Tyr449, Ser494, Asn505         | Arg403 ( $\pi$ -cation), Tyr453 ( $\pi$ - $\pi$ stacked), Gly496 ( $\pi$ -donor hydrogen bond)                                             | <b>-7.3</b> | Gly496, Asn501                 | Arg403 ( $\pi$ -cation), Tyr505 ( $\pi$ - $\pi$ stacked)                                                               | <b>-8.2</b> | Gly496, Gln498                         | Arg403 ( $\pi$ -cation), Tyr453 ( $\pi$ - $\pi$ stacked), Tyr505 ( $\pi$ -alkyl, $\pi$ - $\pi$ stacked and $\pi$ - $\pi$ T-shaped)       |
| <b>Chondramide D (4)</b>        | <b>-8.3</b> | Tyr453, Gly496                                 | Tyr449 ( $\pi$ -alkyl), Tyr505 ( $\pi$ - $\pi$ stacked and $\pi$ - $\pi$ T-shaped)                                                         | <b>-8.2</b> | Tyr453, Asn501, Tyr505         | Tyr449 ( $\pi$ -alkyl), Tyr505 ( $\pi$ - $\pi$ stacked and $\pi$ - $\pi$ T-shaped)                                     | <b>-8.2</b> | Tyr453, Gly496, Tyr505                 | Tyr449 ( $\pi$ -alkyl), Tyr505 ( $\pi$ - $\pi$ stacked and $\pi$ - $\pi$ T-shaped)                                                       |
| <b>Chondramide E2 (5)</b>       | <b>-8.2</b> | Tyr449, Gln498, Asn501                         | Tyr449 ( $\pi$ -alkyl), Tyr505 ( $\pi$ - $\pi$ stacked)                                                                                    | <b>-7.9</b> | Gly496, Asn501                 | Arg403 ( $\pi$ -cation), Tyr449 ( $\pi$ - $\pi$ stacked), Tyr505 ( $\pi$ - $\pi$ T-shaped)                             | <b>-7.9</b> | Gly496, Asn501                         | Arg403 ( $\pi$ -cation), Tyr453 ( $\pi$ - $\pi$ stacked), Tyr505 ( $\pi$ - $\pi$ stacked and $\pi$ - $\pi$ T-shaped)                     |
| <b>Aetheramide B (6)</b>        | <b>-8</b>   | Arg403, Asn501                                 | Lys417 ( $\pi$ -alkyl), Tyr489 ( $\pi$ - $\pi$ T-shaped), Gly496 ( $\pi$ -donor hydrogen bond), Tyr505 ( $\pi$ - $\pi$ T-shaped and alkyl) | <b>-8.1</b> | Arg403, Gly496, Asn501         | Gly496 ( $\pi$ -donor hydrogen bond) Asn501 (C-H bond)                                                                 | <b>-8.1</b> | Arg403, Asn501, Tyr505                 | Tyr489 ( $\pi$ - $\pi$ T-shaped), Gly496 ( $\pi$ -donor hydrogen bond)                                                                   |
| <b>Bromo-chondramide C3 (7)</b> | <b>-8</b>   | Tyr453, Asn501, Tyr505                         | Tyr505 ( $\pi$ - $\pi$ stacked and $\pi$ - $\pi$ T-shaped)                                                                                 | <b>-6.6</b> | Ser494, Gly496, Gln498         | Tyr495 ( $\pi$ -alkyl), Tyr505 ( $\pi$ - $\pi$ T-shaped) Gly496 (C-H bond)                                             | <b>-8</b>   | Glu406, Tyr453, Ser494, Gly496, Tyr505 | Arg403 ( $\pi$ -cation), Lys417 ( $\pi$ -alkyl), Tyr453 ( $\pi$ - $\pi$ stacked), Gly496 ( $\pi$ -donor hydrogen bond)                   |
| <b>Chondramide A9 (8)</b>       | <b>-8.7</b> | Glu406, Tyr449, Tyr453, Ser494, Tyr495, Tyr505 | Arg403 ( $\pi$ -cation), Lys417 ( $\pi$ -alkyl), Tyr453 ( $\pi$ - $\pi$ stacked), Tyr505 ( $\pi$ -alkyl)                                   | <b>-7.7</b> | Ser349, Asn450, Gln493         | Tyr449 and Leu452 ( $\pi$ -alkyl), Phe490 ( $\pi$ - $\pi$ stacked)                                                     | <b>-8.3</b> | Thr470, Gly482, Leu492, Gln493, Ser494 | Phe490 ( $\pi$ - $\pi$ stacked), Gly482 (C-H bond)                                                                                       |

**Table S3.** Summary of the binding energies (BE) and interacting residues of the top compounds against SARS-CoV-2 spike wild-type and variants V438A, F490L, S477N and N439K.

| Cpd | V483A |                                |                                                                                                                                           | F490L |                                |                                                                                                                                           | S477N |                                |                                                                                                                                                                   | N439K |                                |                                                                                                                                           |
|-----|-------|--------------------------------|-------------------------------------------------------------------------------------------------------------------------------------------|-------|--------------------------------|-------------------------------------------------------------------------------------------------------------------------------------------|-------|--------------------------------|-------------------------------------------------------------------------------------------------------------------------------------------------------------------|-------|--------------------------------|-------------------------------------------------------------------------------------------------------------------------------------------|
|     | BE    | Conventional H-bonding         | Other types of molecular interactions                                                                                                     | BE    | Conventional H-bonding         | Other types of molecular interactions                                                                                                     | BE    | Conventional H-bonding         | Other types of molecular interactions                                                                                                                             | BE    | Conventional H-bonding         | Other types of molecular interactions                                                                                                     |
| 1   | -8.5  | Glu406, Tyr453, Ser494, Asn501 | Arg403 ( $\pi$ -cation), Tyr453 ( $\pi$ - $\pi$ stacked), Gly496 ( $\pi$ -donor hydrogen bond), Tyr505 ( $\pi$ -alkyl), Gly496 (C-H bond) | -8.5  | Glu406, Tyr453, Ser494, Asn501 | Arg403 ( $\pi$ -cation), Tyr453 ( $\pi$ - $\pi$ stacked), Gly496 ( $\pi$ -donor hydrogen bond), Tyr505 ( $\pi$ -alkyl), Gly496 (C-H bond) | -8.5  | Glu406, Tyr453, Ser494, Tyr505 | Arg403 ( $\pi$ -cation), Lys417 ( $\pi$ -alkyl), Tyr453 ( $\pi$ - $\pi$ stacked), Gly496 ( $\pi$ -donor hydrogen bond), Tyr505 ( $\pi$ -alkyl), Gly496 (C-H bond) | -8.4  | Glu406, Tyr453, Ser494, Asn501 | Arg403 ( $\pi$ -cation), Tyr453 ( $\pi$ - $\pi$ stacked), Gly496 ( $\pi$ -donor hydrogen bond), Tyr505 ( $\pi$ -alkyl), Gly496 (C-H bond) |
| 2   | -8.4  | Tyr453, Asn501, Tyr505         | Tyr449 ( $\pi$ -alkyl), Tyr505 ( $\pi$ - $\pi$ T-shaped and $\pi$ -alkyl)                                                                 | -8.3  | Tyr449                         | Arg403 ( $\pi$ -cation), Tyr453 ( $\pi$ - $\pi$ stacked), Gly496 ( $\pi$ -donor hydrogen bond), Tyr505 ( $\pi$ -alkyl)                    | -8.4  | Tyr453, Gly496, Asn501         | Tyr449 ( $\pi$ -alkyl), Tyr505 ( $\pi$ - $\pi$ T-shaped and $\pi$ -alkyl)                                                                                         | -8.3  | Tyr449, Tyr505                 | Arg403 ( $\pi$ -cation), Tyr453 ( $\pi$ - $\pi$ stacked), Gly496 ( $\pi$ -donor hydrogen bond), Tyr505 ( $\pi$ -alkyl), Gly496 (C-H bond) |
| 3   | -8.2  | Gly496                         | Arg403 ( $\pi$ -cation), Tyr453 ( $\pi$ - $\pi$ stacked), Tyr505 ( $\pi$ - $\pi$ stacked and $\pi$ -alkyl)                                | -7.4  | Gly496, Gln498                 | Arg403 ( $\pi$ -cation), Tyr453 ( $\pi$ - $\pi$ stacked), Tyr505 ( $\pi$ - $\pi$ stacked and $\pi$ - $\pi$ T-shaped)                      | -7.4  | Gly496                         | Arg403 ( $\pi$ -cation), Tyr505 ( $\pi$ - $\pi$ stacked)                                                                                                          | -7.4  | Gly496, Gln498                 | Arg403 ( $\pi$ -cation), Tyr505 ( $\pi$ - $\pi$ stacked)                                                                                  |
| 4   | -8.3  | Tyr453, Asn501, Tyr505         | Tyr449 ( $\pi$ -alkyl), Tyr505 ( $\pi$ - $\pi$ stacked and $\pi$ - $\pi$ T-shaped)                                                        | -8.2  | Tyr453, Gly496, Tyr505         | Tyr449 ( $\pi$ -alkyl), Tyr505 ( $\pi$ - $\pi$ stacked and $\pi$ - $\pi$ T-shaped)                                                        | -8.2  | Arg403, Asn501, Tyr505         | Tyr449 ( $\pi$ -alkyl), Tyr505 ( $\pi$ - $\pi$ stacked and $\pi$ - $\pi$ T-shaped)                                                                                | -8.2  | Arg403, Asn501, Tyr505         | Tyr449 ( $\pi$ -alkyl), Tyr505 ( $\pi$ - $\pi$ stacked and $\pi$ - $\pi$ T-shaped)                                                        |
| 5   | -7.9  | Gly496, Asn501                 | Arg403 ( $\pi$ -cation), Tyr453 ( $\pi$ - $\pi$ stacked), Tyr505 ( $\pi$ - $\pi$ stacked and $\pi$ - $\pi$ T-shaped)                      | -7.9  | Gly496, Gln498                 | Arg403 ( $\pi$ -cation), Tyr453 ( $\pi$ - $\pi$ stacked), Tyr505 ( $\pi$ - $\pi$ stacked and $\pi$ - $\pi$ T-shaped)                      | -7.9  | Gly496                         | Arg403 ( $\pi$ -cation), Tyr453 ( $\pi$ - $\pi$ stacked), Tyr505 ( $\pi$ - $\pi$ stacked and $\pi$ - $\pi$ T-shaped)                                              | -7.9  | Gly496                         | Arg403 ( $\pi$ -cation), Tyr453 ( $\pi$ - $\pi$ stacked), Tyr505 ( $\pi$ - $\pi$ stacked and $\pi$ - $\pi$ T-shaped)                      |
| 6   | -8.1  | Arg403, Asn501                 | Tyr489 ( $\pi$ - $\pi$ T-shaped), Gly496 ( $\pi$ -donor hydrogen bond), Tyr505 ( $\pi$ -alkyl), Gly496 (C-H bond)                         | -8    | Arg403, Asn501, Tyr505         | Tyr489 ( $\pi$ - $\pi$ T-shaped), Gly496 ( $\pi$ -donor hydrogen bond), Gly496 and Asn501 (C-H bond)                                      | -8.1  | Arg403, Gly496, Asn501         | Arg403 ( $\pi$ -cation), Lys417 (Alkyl), Tyr489 ( $\pi$ -alkyl), Gly496 and Asn501 (C-H bond)                                                                     | -8.1  | Arg403, Gly496                 | Lys417 ( $\pi$ -alkyl), Tyr489 ( $\pi$ - $\pi$ T-shaped), Gly496 (C-H bond)                                                               |
| 7   | -7.8  | Ser494, Gly496, Gln498         | Tyr505 ( $\pi$ - $\pi$ T-shaped and $\pi$ -alkyl), Gly496 (C-H bond)                                                                      | -6.6  | Ser494, Gly496, Gln498         | Tyr505 ( $\pi$ -alkyl and $\pi$ - $\pi$ T-shaped), Gly496 (C-H bond)                                                                      | -7.8  | Tyr453, Asn501, Tyr505         | Tyr505 ( $\pi$ - $\pi$ stacked and $\pi$ - $\pi$ T-shaped)                                                                                                        | -6.6  | Ser494, Gly496, Gln498         | Tyr505 ( $\pi$ - $\pi$ T-shaped and $\pi$ -alkyl), Gly496 (C-H bond)                                                                      |
| 8   | -8.2  | Asn450, Gln493                 | Tyr449 and Leu452 ( $\pi$ -alkyl), Tyr449 (C-H bond)                                                                                      | -7.6  | Tyr449, Gln493, Ser494         | Tyr505 ( $\pi$ -alkyl), Tyr495 and Gly496 (C-H bond)                                                                                      | -7.7  | Ser494, Gln498                 | Tyr505 ( $\pi$ -alkyl) and Gly496 (C-H bond)                                                                                                                      | -7.7  | Phe347, Ser349, Asn450, Gln493 | Tyr449 and Leu452 ( $\pi$ -alkyl)                                                                                                         |

**Table S4.** List of active residues set and protein-protein dock poses during protein-protein docking of spike against host receptors.

| Receptor | Active Residues |               | Dock poses                                                                                          |
|----------|-----------------|---------------|-----------------------------------------------------------------------------------------------------|
|          | Spike protein   | Host receptor |                                                                                                     |
| ACE2     | 403-505         | 24-393        | 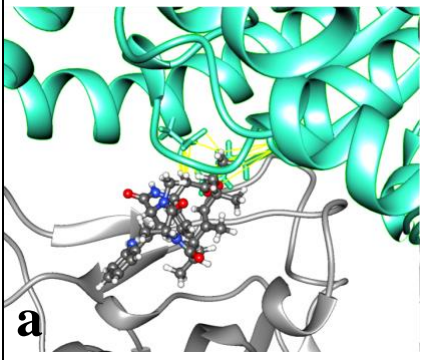 <p><b>a</b></p>  |
| GRP78    | 479-481         | 428-458       |  <p><b>b</b></p> |

Protein-protein docking poses showing ligand-protein atomic clash of (a) spike RDB/chondramide C3 - ACE2 complex and (b) spike RBD/chondramide C6 – GRP78 complex.

**Table S5.** Summary of binding energies of top compounds against spike RBD for ACE2 or GRP78, ACE2, and GRP78 based on selectivity docking.

| Cpd      | Binding Energy (kcal/mol) |       |       |       |      |       |
|----------|---------------------------|-------|-------|-------|------|-------|
|          | Spike RBD                 |       |       |       | ACE2 | GRP78 |
|          | Wild type                 | N501Y | E484K | D614G |      |       |
| <b>1</b> | -8.7                      | -     | -     | -     | -6.1 | -     |
| <b>2</b> | -8.6                      | -9.1  | -8.7  | -8.3  | -7.0 | -     |
| <b>9</b> | -8.8                      | -     | -     | -     | -    | -6.6  |

These compounds emerged as top chondramides against spike RBDs for ACE2 (Cpd 1 and 2) and GRP78 (Cpd 9). In addition, Cpd 2 is summarized with BEs against the variants due to high affinities despite mutations (see Table 1).

**Table S6.** Lipinski's Rule of Five for ADME analysis of compounds **1–9**.

| Cpd      | MW (<500) | #H-bond acceptors (<10) | #H-bond donors (<5) | MLOGP (<5) | Lipinski #violations | Drug Likeness |
|----------|-----------|-------------------------|---------------------|------------|----------------------|---------------|
| <b>1</b> | 651.19    | 6                       | 4                   | 2.45       | 1                    | YES           |
| <b>2</b> | 616.75    | 6                       | 4                   | 2          | 1                    | YES           |
| <b>3</b> | 667.19    | 7                       | 5                   | 1.68       | 2                    | NO            |
| <b>4</b> | 651.19    | 6                       | 4                   | 2.45       | 1                    | YES           |
| <b>5</b> | 667.19    | 7                       | 5                   | 1.68       | 2                    | NO            |
| <b>6</b> | 718.88    | 9                       | 3                   | 1.88       | 1                    | YES           |
| <b>7</b> | 695.64    | 6                       | 4                   | 2.53       | 1                    | YES           |
| <b>8</b> | 857.34    | 13                      | 7                   | -0.41      | 3                    | NO            |
| <b>9</b> | 731.17    | 9                       | 5                   | 1.74       | 2                    | NO            |

**Table S7.** Predicted toxicity parameters and solubility of compounds **1–9**.

| Cpd      | Toxicity Risks |                |                 |                       |
|----------|----------------|----------------|-----------------|-----------------------|
|          | Mutagenicity   | Tumorigenicity | Irritant effect | Reproductive toxicity |
| <b>1</b> | None           | None           | None            | None                  |
| <b>2</b> | None           | None           | None            | None                  |
| <b>3</b> | None           | None           | None            | None                  |
| <b>4</b> | None           | None           | None            | None                  |
| <b>5</b> | None           | None           | None            | None                  |
| <b>6</b> | None           | None           | Medium-risk     | None                  |
| <b>7</b> | None           | None           | None            | None                  |
| <b>8</b> | None           | None           | None            | None                  |
| <b>9</b> | None           | None           | None            | None                  |

**Table S8.** Docking grid coordinates of SARS-CoV-2 spike proteins and host receptors.

| Protein (PDB ID)               | Coordinates |     |     | Protein (PDB ID)     | Coordinates |    |     |
|--------------------------------|-------------|-----|-----|----------------------|-------------|----|-----|
|                                | x           | y   | z   |                      | x           | y  | z   |
| SARS-CoV-2 RBD to ACE2 (6M0J)  | -38         | 30  | 5   | ACE2 (6M0J, chain A) | -30         | 30 | 0   |
| SARS-CoV-2 RBD to GRP78 (6VXX) | 210         | 178 | 262 | GRP78 (5E84)         | 23          | 60 | -33 |

**REFERENCES:**

- (1) Herrmann, J.; Hüttel, S.; Müller, R. Discovery and biological activity of new chondramides from *Chondromyces* sp. *Chembiochem*, **2013**, *14* (13), 1573–1580. <https://doi.org/10.1002/cbic.201300140>.
- (2) Mulwa, L. S., & Stadler, M. (2018). Antiviral compounds from Myxobacteria. *Microorganisms*, *6*(3), 73–88. <https://doi.org/10.3390/microorganisms6030073>.
